# Supplementary material for: The Association between Salt and Potential Mediators of the Gastric Precancerous Process
Source: Cancers (Basel). 2019 Apr 15;11(4):535. doi: 10.3390/cancers11040535 (PMC6520685; doi:10.3390/cancers11040535)
Supplement: Supplementary file 1 [file cancers-11-00535-s001.pdf]

# Supplementary Materials: The Association Between Salt and Potential Mediators of the Gastric Precancerous Process

Susan Thapa, Lori A. Fischbach, Robert Delongchamp, Mohammed F. Faramawi and Mohammed Orloff

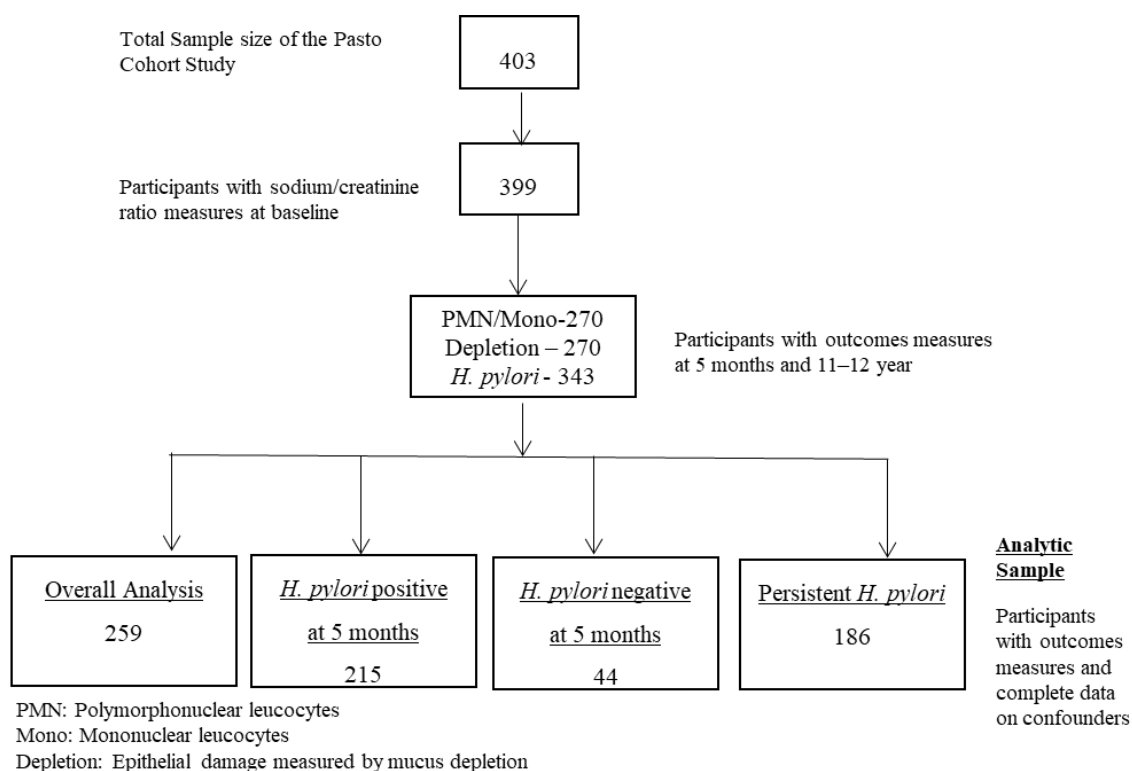

**Figure S1.** Sample sizes for the analyses of the estimated effect of sodium/creatinine ratio on gastric inflammation, epithelial damage, *H. pylori* infection density, and gastric epithelial cell proliferation.

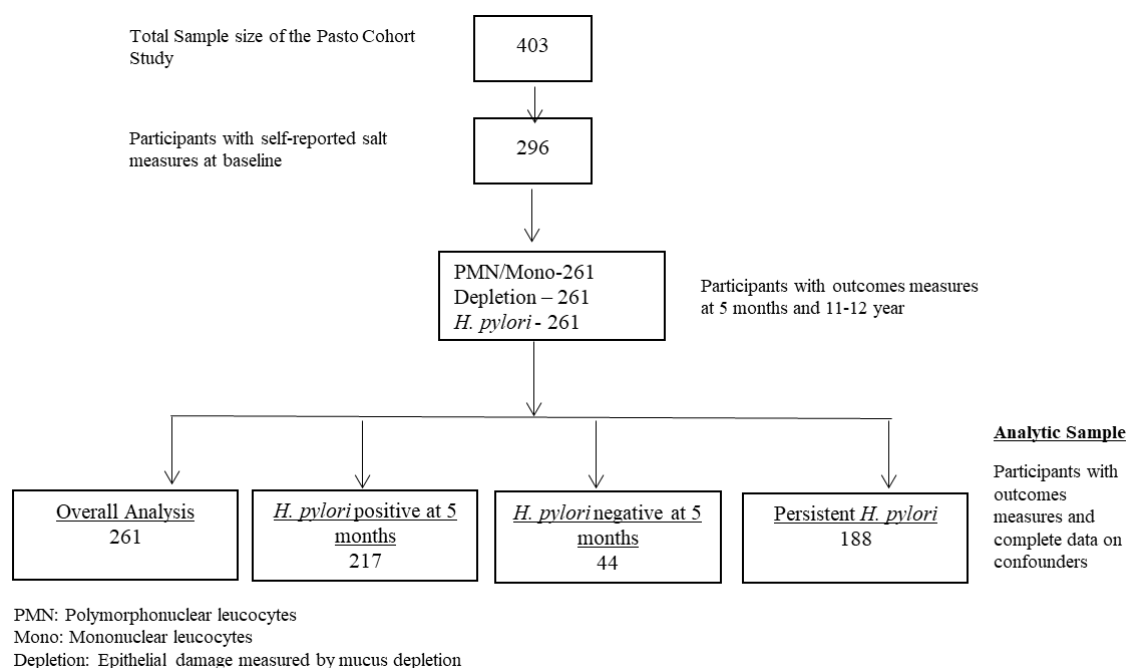

**Figure S2.** Sample sizes for the analyses of the estimated effect of self-reported salt intake (frequency of adding salt to foods and total added salt) on gastric inflammation, epithelial damage, *H. pylori* infection density, and gastric epithelial cell proliferation.

**Table S1.** Results of linear regression for the estimated effect of salt intake measured as the frequency of adding salt to foods at baseline on gastric inflammation and epithelial damage.<sup>a</sup>

|                                                                            |                                                                                          | Adjusted $\beta$ (95% Confidence Intervals) <sup>b</sup> |                              |                                                               |                                                              |                                                                                                            |
|----------------------------------------------------------------------------|------------------------------------------------------------------------------------------|----------------------------------------------------------|------------------------------|---------------------------------------------------------------|--------------------------------------------------------------|------------------------------------------------------------------------------------------------------------|
|                                                                            | Outcome                                                                                  | Level                                                    | Overall<br>( <i>n</i> = 261) | <i>H. pylori</i> Positive at 5<br>Months<br>( <i>n</i> = 217) | <i>H. pylori</i> Negative at<br>5 Months<br>( <i>n</i> = 44) | Persistent <i>H. pylori</i><br>Infection (Positive at 5<br>Months and at 11–12 Years)<br>( <i>n</i> = 188) |
| Gastric<br>Inflammation                                                    | Change in average<br>inflammation<br>(5 months vs 11–12 years)                           | PMN                                                      | 0.155 (−0.065, 0.376)        | 0.121 (−0.448, 0.690)                                         | 0.101 (−0.091, 0.293)                                        | 0.155 (−0.065, 0.376)                                                                                      |
|                                                                            |                                                                                          | Mononuclear                                              | 0.036 (−0.081, 0.152)        | 0.377 (−0.035, 0.790)                                         | 0.023 (−0.074, 0.119)                                        | 0.036 (−0.081, 0.152)                                                                                      |
|                                                                            |                                                                                          | Combined                                                 | 0.096 (−0.061, 0.252)        | 0.249 (−0.218, 0.717)                                         | 0.062 (−0.065, 0.189)                                        | 0.096 (−0.061, 0.252)                                                                                      |
|                                                                            | Change in maximum<br>inflammation<br>(5 months vs 11–12 years)                           | PMN                                                      | 0.092 (−0.151, 0.334)        | 0.159 (−0.511, 0.829)                                         | 0.001 (−0.207, 0.209)                                        | 0.092 (−0.151, 0.334)                                                                                      |
|                                                                            |                                                                                          | Mononuclear                                              | 0.068 (−0.106, 0.241)        | 0.160 (−0.275, 0.595)                                         | 0.040 (−0.120, 0.200)                                        | 0.068 (−0.106, 0.241)                                                                                      |
|                                                                            |                                                                                          | Combined                                                 | 0.040 (−0.150, 0.231)        | 0.235 (−0.256, 0.726)                                         | −0.031 (−0.198, 0.137)                                       | 0.040 (−0.150, 0.231)                                                                                      |
| Epithelial<br>Damage                                                       | Change in average<br>Epithelial damage (5 vs 11–<br>12 years)                            |                                                          | 0.088 (−0.137, 0.313)        | 0.471 (−0.186, 1.129)                                         | 0.049 (−0.163, 0.261)                                        | 0.088 (−0.137, 0.313)                                                                                      |
|                                                                            | Change in maximum<br>Epithelial Damage (5 vs 11–<br>12 years)                            |                                                          | 0.049 (−0.212, 0.310)        | 0.659 (−0.113, 1.432)                                         | −0.013 (−0.239, 0.214)                                       | 0.049 (−0.212, 0.310)                                                                                      |
| Interaction<br>between gastric<br>inflammation<br>and epithelial<br>damage | Inflammation at 5 months *<br>Mucus Depletion at 11–12<br>years                          | PMN                                                      | −0.079 (−0.701, 0.543)       | 0.249 (−0.410, 0.908)                                         | 0.599 (−0.165, 1.363)                                        | 0.153 (−0.516, 0.823)                                                                                      |
|                                                                            |                                                                                          | Mononuclear                                              | 0.038 (−0.365, 0.440)        | 0.258 (−0.188, 0.705)                                         | 0.257 (−0.581, 1.094)                                        | 0.194 (−0.235, 0.622)                                                                                      |
|                                                                            |                                                                                          | Combined                                                 | 0.017 (−0.540, 0.574)        | 0.271 (−0.341, 0.884)                                         | 0.675 (−0.324, 1.673)                                        | 0.179 (−0.408, 0.766)                                                                                      |
|                                                                            | Inflammation at 11–12 years<br>* Mucus Depletion at 5<br>months                          | PMN                                                      | −0.141 (−0.664, 0.381)       | 0.225 (−0.343, 0.792)                                         | 0.030 (−0.701, 0.761)                                        | 0.156 (−0.442, 0.754)                                                                                      |
|                                                                            |                                                                                          | Mononuclear                                              | −0.171 (−0.615, 0.273)       | 0.221 (−0.258, 0.70)                                          | −0.619 (−1.238, 0.001)                                       | 0.191 (−0.334, 0.715)                                                                                      |
|                                                                            |                                                                                          | Combined                                                 | −0.271 (−0.778, 0.235)       | 0.152 (−0.392, 0.696)                                         | −0.560 (−1.329, 0.208)                                       | 0.091 (−0.502, 0.683)                                                                                      |
| <i>H. pylori</i><br>infection<br>density                                   | Change in average <i>H. pylori</i><br>density (5 months vs 11–12<br>years)               |                                                          | 0.051 (−0.178, 0.281)        | 0.137 (−0.396, 0.670)                                         |                                                              | 0.051 (−0.178, 0.281)                                                                                      |
|                                                                            | Change in max <i>H. pylori</i><br>density (5 months vs 11–12<br>years)                   |                                                          | 0.091 (−0.183, 0.364)        | 0.233 (−0.392, 0.857)                                         |                                                              | 0.091 (−0.183, 0.364)                                                                                      |
| Interaction<br>between<br>density of <i>H.</i><br><i>pylori</i> infection, | Density of <i>H. pylori</i><br>infection at 5 months *<br>Mucus Depletion at 5<br>months |                                                          | −0.227 (−0.654, 0.201)       | 0.064 (−0.384, 0.512)                                         |                                                              | 0.065 (−0.435, 0.565)                                                                                      |

|                                          |                                                                                            |             |                        |                       |                       |
|------------------------------------------|--------------------------------------------------------------------------------------------|-------------|------------------------|-----------------------|-----------------------|
| inflammation<br>and epithelial<br>damage | Density of <i>H. pylori</i><br>infection at 11–12 years *                                  |             | –0.022 (–0.686, 0.642) | 0.103 (–0.612, 0.817) | 0.125 (–0.499, 0.749) |
|                                          | Mucus Depletion at 11–12<br>years                                                          |             |                        |                       |                       |
|                                          | Density of <i>H. pylori</i><br>infection at 5 months *                                     |             | –0.214 (–0.808, 0.380) | 0.277 (–0.317, 0.871) | 0.141 (–0.420, 0.701) |
|                                          | Mucus Depletion at 11–12<br>years                                                          |             |                        |                       |                       |
|                                          | Density of <i>H. pylori</i><br>infection at 11–12 years<br>*Mucus Depletion at 5<br>months |             | –0.068 (–0.571, 0.434) | 0.278 (–0.274, 0.830) | 0.173 (–0.389, 0.735) |
|                                          | Density of <i>H. pylori</i><br>infection at 5 months *                                     | PMN         | –0.297 (–1.735, 1.140) | 0.695 (–0.862, 2.252) | 0.503 (–1.134, 2.139) |
|                                          |                                                                                            | Mononuclear | –0.265 (–1.328, 0.797) | 0.520 (–0.620, 1.659) | 0.370 (–0.817, 1.557) |
|                                          | Inflammation at 5 months *                                                                 |             |                        |                       |                       |
|                                          | Mucus Depletion at 11–12<br>years                                                          | Combined    | –0.312 (–1.731, 1.107) | 0.751 (–0.757, 2.258) | 0.574 (–0.978, 2.126) |
|                                          | Density of <i>H. pylori</i><br>infection at 11–12 years *                                  | PMN         | –0.073 (–1.582, 1.435) | 0.987 (–0.686, 2.659) | 0.748 (–1.001, 2.498) |
|                                          |                                                                                            | Mononuclear | 0.113 (–1.180, 1.406)  | 1.068 (–0.365, 2.502) | 0.888 (–0.602, 2.379) |
|                                          | Inflammation at 11–12<br>years *                                                           |             |                        |                       |                       |
|                                          | Mucus Depletion at<br>5 months                                                             | Combined    | –0.151 (–1.661, 1.358) | 0.899 (–0.772, 2.569) | 0.627 (–1.107, 2.362) |

<sup>a</sup> The change in score for the outcome per increase in salt intake frequency (the three categories of salt intake include: rarely or never adds salt to foods, occasionally adds salt to foods, and always or frequently adds salt to foods).

<sup>b</sup> Adjusted for age, car ownership, and fresh fruit and vegetable intake; for changes in gastric inflammation, epithelial damage, and density of *H. pylori* infection; and for baseline measures.

**Table S2.** Results of linear regression for the estimated effect of salt intake measured as total salt added to food at baseline on gastric inflammation and epithelial damage.

|                                                                            |                                                                                       | Adjusted $\beta$ (95% Confidence Intervals) <sup>a</sup> |                              |                                                               |                                                              |                                                                                                            |
|----------------------------------------------------------------------------|---------------------------------------------------------------------------------------|----------------------------------------------------------|------------------------------|---------------------------------------------------------------|--------------------------------------------------------------|------------------------------------------------------------------------------------------------------------|
|                                                                            | Outcome                                                                               | Level                                                    | Overall<br>( <i>n</i> = 261) | <i>H. pylori</i> Positive at 5<br>Months<br>( <i>n</i> = 217) | <i>H. pylori</i> Negative at<br>5 Months<br>( <i>n</i> = 44) | Persistent <i>H. pylori</i><br>Infection (Positive at 5<br>Months and at 11–12 Years)<br>( <i>n</i> = 188) |
| Gastric<br>Inflammation                                                    | Change in average<br>inflammation<br>(5 months vs 11–12 years)                        | PMN                                                      | −0.009 (−0.137, 0.119)       | 0.010 (−0.120, 0.140)                                         | −0.214 (−0.593, 0.164)                                       | −0.007 (−0.117, 0.104)                                                                                     |
|                                                                            |                                                                                       | Mononuclear                                              | −0.008 (−0.079, 0.062)       | 0.014 (−0.055, 0.082)                                         | −0.143 (−0.420, 0.133)                                       | 0.007 (−0.049, 0.062)                                                                                      |
|                                                                            |                                                                                       | Combined                                                 | −0.011 (−0.102, 0.080)       | 0.011 (−0.081, 0.103)                                         | −0.192 (−0.506, 0.121)                                       | −0.001 (−0.074, 0.072)                                                                                     |
|                                                                            | Change in maximum<br>inflammation<br>(5 months vs 11–12 years)                        | PMN                                                      | −0.027 (−0.173, 0.119)       | 0.004 (−0.138, 0.146)                                         | −0.301 (−0.744, 0.141)                                       | −0.010 (−0.129, 0.109)                                                                                     |
|                                                                            |                                                                                       | Mononuclear                                              | 0.042 (−0.054, 0.137)        | 0.040 (−0.062, 0.142)                                         | −0.028 (−0.313, 0.257)                                       | 0.027 (−0.064, 0.119)                                                                                      |
|                                                                            |                                                                                       | Combined                                                 | −0.022 (−0.130, 0.086)       | −0.009 (−0.121, 0.103)                                        | −0.199 (−0.528, 0.129)                                       | −0.028 (−0.124, 0.068)                                                                                     |
| Epithelial<br>Damage                                                       | Change in average<br>Epithelial damage (5 vs<br>11–12 years)                          |                                                          | −0.019 (−0.149, 0.110)       | −0.003 (−0.135, 0.129)                                        | −0.122 (−0.56, 0.317)                                        | −0.020 (−0.141, 0.101)                                                                                     |
|                                                                            | Change in maximum<br>Epithelial Damage (5 vs<br>11–12 years)                          |                                                          | 0.029 (−0.121, 0.179)        | 0.027 (−0.127, 0.180)                                         | 0.028 (−0.495, 0.551)                                        | 0.008 (−0.121, 0.138)                                                                                      |
| Interaction<br>between gastric<br>inflammation<br>and epithelial<br>damage | Inflammation at 5 months *                                                            | PMN                                                      | 0.165 (−0.210, 0.540)        | 0.141 (−0.246, 0.527)                                         | 0.477 (0.009, 0.945)                                         | 0.074 (−0.309, 0.457)                                                                                      |
|                                                                            | Mucus Depletion at 11–12<br>years                                                     | Mononuclear                                              | −0.055 (−0.298, 0.188)       | −0.035 (−0.298, 0.228)                                        | 0.065 (−0.461, 0.591)                                        | −0.090 (−0.335, 0.155)                                                                                     |
|                                                                            |                                                                                       | Combined                                                 | 0.135 (−0.201, 0.471)        | 0.123 (−0.236, 0.483)                                         | 0.450 (−0.172, 1.073)                                        | 0.050 (−0.286, 0.386)                                                                                      |
|                                                                            | Inflammation at 11–12<br>years * Mucus Depletion at<br>5 months                       | PMN                                                      | −0.040 (−0.355, 0.276)       | 0.004 (−0.329, 0.337)                                         | 0.023 (−0.433, 0.480)                                        | −0.050 (−0.392, 0.292)                                                                                     |
|                                                                            |                                                                                       | Mononuclear                                              | −0.058 (−0.326, 0.210)       | −0.028 (−0.309, 0.254)                                        | −0.029 (−0.436, 0.378)                                       | −0.086 (−0.386, 0.214)                                                                                     |
|                                                                            |                                                                                       | Combined                                                 | −0.071 (−0.377, 0.236)       | −0.030 (−0.350, 0.289)                                        | −0.003 (−0.497, 0.490)                                       | −0.092 (−0.431, 0.246)                                                                                     |
| <i>H. pylori</i><br>infection<br>density                                   | Change in average <i>H. pylori</i><br>density (5 months vs 11–12<br>years)            |                                                          | −0.056 (−0.194, 0.082)       | −0.055 (−0.189, 0.079)                                        |                                                              | −0.081 (−0.203, 0.041)                                                                                     |
|                                                                            | Change in max <i>H. pylori</i><br>density (5 months vs 11–12<br>years)                |                                                          | −0.012 (−0.173, 0.150)       | 0.001 (−0.159, 0.161)                                         |                                                              | −0.035 (−0.158, 0.089)                                                                                     |
| Interaction<br>between<br>density of <i>H.</i>                             | Density of <i>H. pylori</i> infection at 5<br>months * Mucus Depletion at 5<br>months |                                                          | −0.093 (−0.349, 0.164)       | −0.093 (−0.354, 0.169)                                        |                                                              | −0.093 (−0.378, 0.191)                                                                                     |

|                                                             |                                                                                       |             |                        |                        |                        |
|-------------------------------------------------------------|---------------------------------------------------------------------------------------|-------------|------------------------|------------------------|------------------------|
| <i>pylori</i> infection, inflammation and epithelial damage | Density of <i>H. pylori</i> infection at 11–12 years * Mucus Depletion at 11–12 years |             | −0.057 (−0.456, 0.341) | −0.011 (−0.430, 0.409) | −0.082 (−0.438, 0.275) |
|                                                             | Density of <i>H. pylori</i> infection at 5 months * Mucus Depletion at 11–12 years    |             | 0.017 (−0.340, 0.373)  | 0.053 (−0.295, 0.401)  | −0.008 (−0.327, 0.311) |
|                                                             | Density of <i>H. pylori</i> infection at 11–12 years * Mucus Depletion at 5 months    |             | −0.145 (−0.448, 0.158) | −0.135 (−0.459, 0.189) | −0.179 (−0.499, 0.142) |
|                                                             | Density of <i>H. pylori</i> infection at 5 months * Inflammation at 5 months *        | PMN         | 0.258 (−0.605, 1.120)  | 0.380 (−0.530, 1.291)  | 0.269 (−0.663, 1.201)  |
|                                                             |                                                                                       | Mononuclear | −0.053 (−0.691, 0.585) | 0.009 (−0.659, 0.676)  | −0.081 (−0.757, 0.595) |
|                                                             | Mucus Depletion at 11–12 years                                                        | Combined    | 0.242 (−0.610, 1.093)  | 0.367 (−0.514, 1.249)  | 0.249 (−0.635, 1.133)  |
|                                                             | Density of <i>H. pylori</i> infection at 11–12 years * Inflammation at 11–12 years *  | PMN         | −0.354 (−1.263, 0.555) | −0.288 (−1.272, 0.696) | −0.398 (−1.399, 0.602) |
|                                                             |                                                                                       | Mononuclear | −0.366 (−1.145, 0.413) | −0.344 (−1.187, 0.500) | −0.453 (−1.306, 0.400) |
|                                                             | years * Mucus Depletion at 5 months                                                   | Combined    | −0.414 (−1.324, 0.495) | −0.361 (−1.343, 0.620) | −0.482 (−1.473, 0.508) |

<sup>a</sup> The change in score for the outcome per increase in salt intake in grams. <sup>b</sup> Adjusted for age, car ownership, and fresh fruit and vegetable intake; for changes in gastric inflammation, epithelial damage, and density of *H. pylori* infection; and for baseline measures.

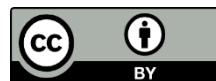

© 2019 by the authors. Submitted for possible open access publication under the terms and conditions of the Creative Commons Attribution (CC BY) license (<http://creativecommons.org/licenses/by/4.0/>).
